# Supplementary material
Source: Springer Nature journal article supplement (https://www.springermedizin.de/resource/supplementary/12876_2014_1161_MOESM2_ESM.pdf/9438234)

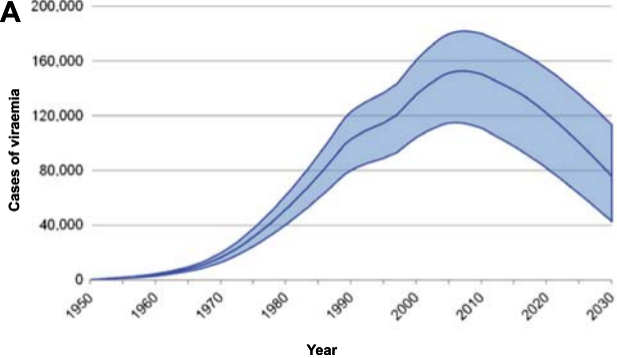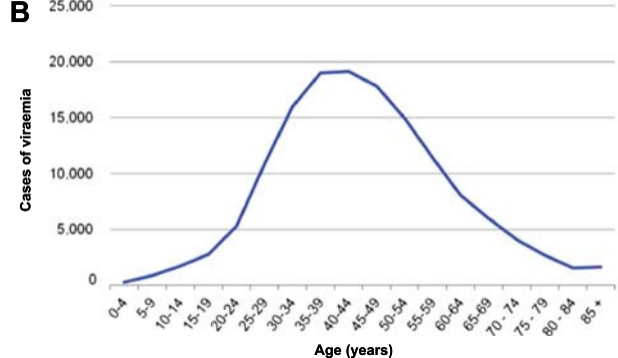

Supplement: MOESM2 [file 9438234]
